# Supplementary material for: S100A9-CXCL12 activation in BRCA1-mutant breast cancer promotes an immunosuppressive microenvironment associated with resistance to immunotherapy
Source: PubMed Central journal article supplement (PMC8933470; doi:10.1038/s41467-022-29151-5), 2022-03-18
Supplement: 41467_2022_29151_MOESM4_ESM.pdf [file 41467_2022_29151_MOESM4_ESM.pdf]

**Title:** Supplementary Data 1.

**Description:** RNA-seq. of CD11B+/GR1+ cells from MG, SP and BT between WT and MT mice.

**Title:** Supplementary Data 2.

**Description:** DIA-MS profile at different development groups from both Brca1 MT and WT mice.

**Title:** Supplementary Data 3.

**Description:** The CV% of duplicate per sample in DIA-MS.

**Title:** Supplementary Data 4.

**Description:** 453 genes in terms of its relative fold change from RNA sequencing on four mammary epithelial cell lines with differential expression of S100a9, including the WT, over expression (OE)-S100a9-WT, Brca1-MT, and sgS100a9-Brca1-MT cell lines
